# Supplementary material for: Evidence for a Role of the Transcriptional Regulator Maid in Tumorigenesis and Aging
Source: PLOS journal article supplement (doi:10.1371/journal.pone.0129950), 2015-06-24

Wt siblings for line52

HHM transgenic line52

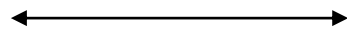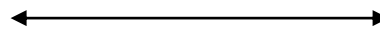

Maid

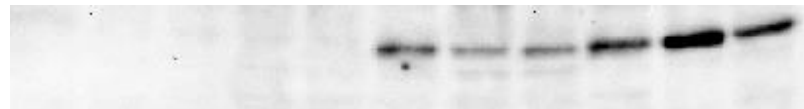

Ponseau

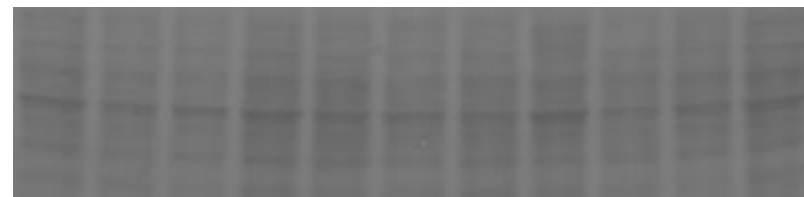

Supplement: S3 (10.1371/journal.pone.0129950.s003) [file journal.pone.0129950.s003]
